# Supplementary material for: Key traits influencing wind resistance of Eucalyptus camaldulensis
Source: Research Square preprint supplement (doi:10.21203/rs.3.rs-1734867/v1), 2022-06-13
Supplement: Supplementary file 1 [file 2bc5eefe79a507348c65e216.docx]

Appendix EVariables of different *Eucalyptus camaldulensis* family in tree pulling test

| Family | X1/mm | X2/° | X3/° | Yforcemax/N |
| --- | --- | --- | --- | --- |
| CA16 | -1145.10 | 2.94 | 14.29 | 990.0 |
| CA21 | -326.20 | -0.06 | 12.54 | 551.5 |
| CA22 | -192.90 | 2.30 | 18.15 | 824.1 |
| CA26 | -1838.10 | 1.11 | 16.57 | 947.6 |
| CA27 | 0.00 | -2.56 | 7.33 | 367.1 |
| CA28 | -2389.20 | 1.77 | -14.33 | 1311.4 |
| CA5 | -16.50 | 2.93 | 12.29 | 835.3 |
| CA7 | 0.00 | -2.56 | 7.33 | 367.1 |
| CA8 | -975.00 | -1.08 | 14.63 | 1223.2 |
| CA9 | -1175.40 | 0.73 | -9.59 | 1993.2 |
| C013 | -3136.10 | 3.08 | 7.15 | 1820.7 |
| C014 | -1309.00 | -0.26 | -10.54 | 618.0 |
| C023 | -1810.60 | 2.34 | 17.15 | 2263.6 |
| C033 | -310.70 | 5.09 | -13.51 | 953.0 |
| C036 | -1204.20 | 15.77 | 10.41 | 1031.6 |
| C04 | -1309.00 | -0.26 | -10.54 | 620.8 |
| C046 | -39.90 | 18.81 | -11.34 | 689.9 |
| C076 | -1378.50 | -0.57 | 11.90 | 1461.6 |
| C079 | -1174.70 | -0.49 | 19.65 | 1772.3 |
| C080 | -161.10 | 2.39 | 14.02 | 436.5 |
